# Supplementary material for: Study of the behavior pattern, carbon reduction effect and business costs of electric motorcycles on island
Source: Preprints.org preprint supplement (doi:10.20944/preprints201807.0385.v1), 2018-07-20
Supplement: Supplementary file 2 [file supplementary]

**Title page with author details**

Author: Shyang-Chyuan Fang*

Department [of Tourism and Leisure](http://english.npu.edu.tw/from/index-1.asp?m=2&m1=13&m2=250&gp=239&id=2211), National Penghu University of Science and Technology.No.300, Liuhe Rd., Magong City, Penghu County 880, Taiwan

*Tel.:+886 6 9264115.

E-mail addresses:chyuansf2012@gmail.com, chyuansf@gms.npu.edu.tw.
